# Supplementary material for: Molecular Analysis of East African Lumpy Skin Disease Viruses Reveals a Mixed Isolate with Features of Both Vaccine and Field Isolates
Source: MDPI journal article supplement (doi:10.3390/microorganisms9061142), 2021-05-26
Supplement: s1 [file s1]

**Supplement Table S1.** Primers used for targeted sequencing by NGS. The primer sequences, amplicon sizes and their positions in LSDV NI-2490 (NC\_003027) and the targeted genes are provided.

| Primer name     | sequence                  | Product size/targeted gene (ORF)/position in LSDV NI-2490                             |
|-----------------|---------------------------|---------------------------------------------------------------------------------------|
| EEV_GP_CaPVFw   | ATACGTCGTAGTACCATTTTCATTT | 505 pb/ EEV glycoprotein gene (LSDV126)/(116161- 116665)                              |
| EEV_GP_CaPVRv   | TGACTCGGAATTATTTTGTGC     |                                                                                       |
| B22R_CaPVFw     | TCATTTTCTTCTAGTTCCGACGA   | 863 bp/ B22R-like protein gene (LSDV 134)/124207-125069)                              |
| B22R_CaPVRv     | TTCGTTGATGATAAATAACTGGAAA |                                                                                       |
| GPCR_div_CaPVFw | CAGTTAGTAGCGCCACCATGTA    | 414 bp/ G protein-coupled chemokine receptor-like protein gene (LSDV011)/(7686- 8099) |
| GPCR_div_CaPVRv | AAGGAAACACCAACACGAAAA     |                                                                                       |
| R-Hel_CaPVFw    | ACAGCGACACTAGAGGACGA      | 400 bp/ RNA-Helicase gene (LSDV049)/(43968- 44367)                                    |
| R-Hel_CaPVRv    | TCGTCACGCTTGATTCTAAA      |                                                                                       |
| NTP_CaPVFw      | CATTGGGAAGAAGGATTTTG      | 386 bp/ NTPase gene (LSDV083)/(75005-75390)                                           |
| NTP_CaPVRv      | CCACATTCCCGAGAAGAAAA      |                                                                                       |
| 4b_CaPVFw       | GCTCTTAACAGACATGCTGGAG    | 360 bp/ virion core protein p4b gene (LSDV094)/(88690- 89049)                         |
| 4b_CaPVRv       | ATCTCAGCAGGGGCTAGACA      |                                                                                       |
| E3_CaPVFw       | TTATACGCGTCTACCGAAAGAA    | 302 bp/E3 ubiquitin-protein ligase p28-like protein gene (LSDV140)/(133069 133371)    |
| E3_CaPVRv       | GGAATTCATTCTACATACTGGACA  |                                                                                       |
